# Supplementary material for: Structurally precise cationic polythiophene- b -polyglutamate diblock copolymers with tunable polyplex morphologies for efficient PCI-mediated gene delivery
Source: Royal Society of Chemistry journal article supplement (doi:10.1039/d5nj04445f), 2026-01-01
Supplement: d5nj04445f1.pdf [file d5nj04445f1.pdf]

*Supplementary information*

**Structurally Precise Cationic Polythiophene-*b*-  
Polyglutamate Diblock Copolymers with Tunable Polyplex  
Morphologies for Efficient PCI-Mediated Gene Delivery**

Chi Zhang, Xuefei Li, Xiangkun Zhang, Zhongyi Li, Chuanzhi Liu, Ya  
Chen and Bin Zhai\*

*Department School of Chemistry & Chemical Engineering,  
Engineering Research Center for Optoelectronic Functional  
Materials of Henan Province, Shangqiu Normal University,  
Shangqiu 476000, P. R. China.*

E-mail: zhaibin\_1978@163.com

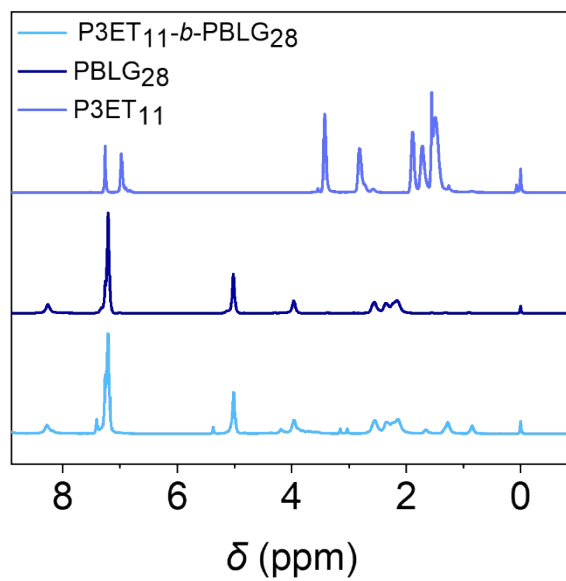

**Fig. S1**  $^1\text{H}$  NMR spectra of P3ET<sub>11</sub>, PBLG<sub>28</sub>, and P3ET<sub>11</sub>-*b*-PBLG<sub>28</sub> in  $\text{CDCl}_3$ .

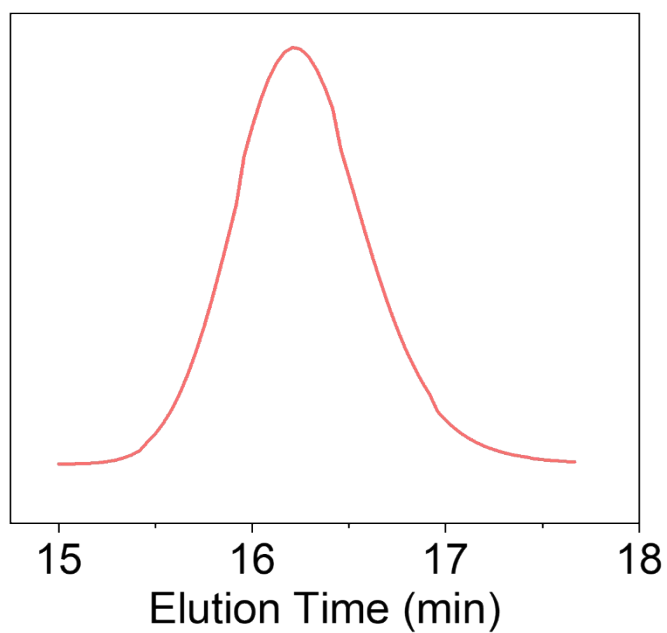

**Fig. S2** GPC trace of PBLG<sub>28</sub>.

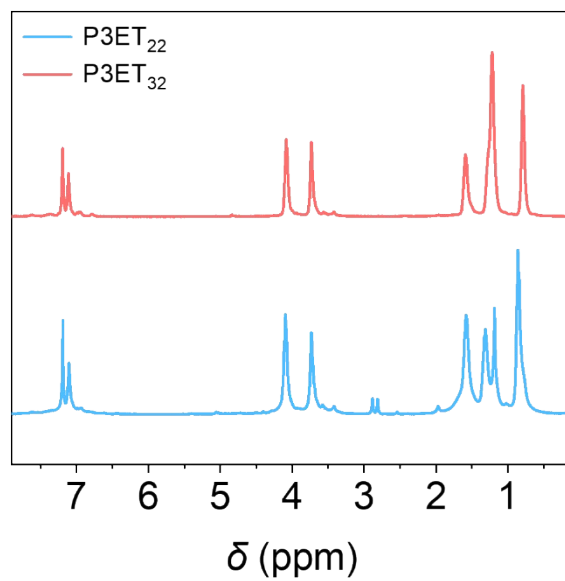

**Fig. S3**  $^1\text{H}$  NMR spectra of  $\text{P3ET}_{22}$  and  $\text{P3ET}_{32}$  in  $\text{CDCl}_3$ .

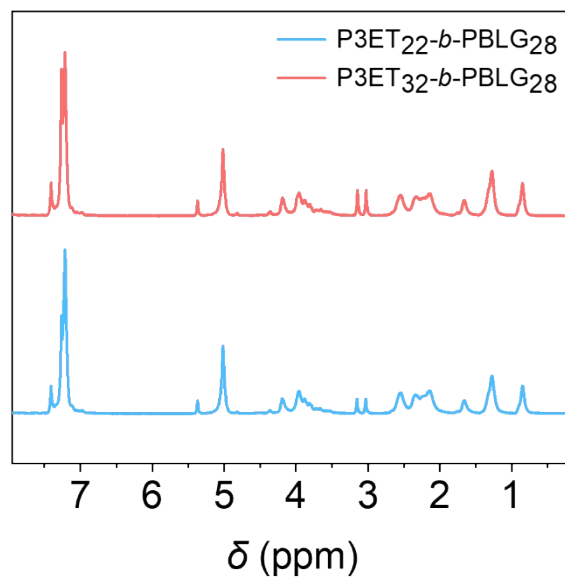

**Fig. S4**  $^1\text{H}$  NMR spectra of  $\text{P3ET}_{22}\text{-}b\text{-PBLG}_{28}$  and  $\text{P3ET}_{32}\text{-}b\text{-PBLG}_{28}$  in  $\text{CDCl}_3$ .

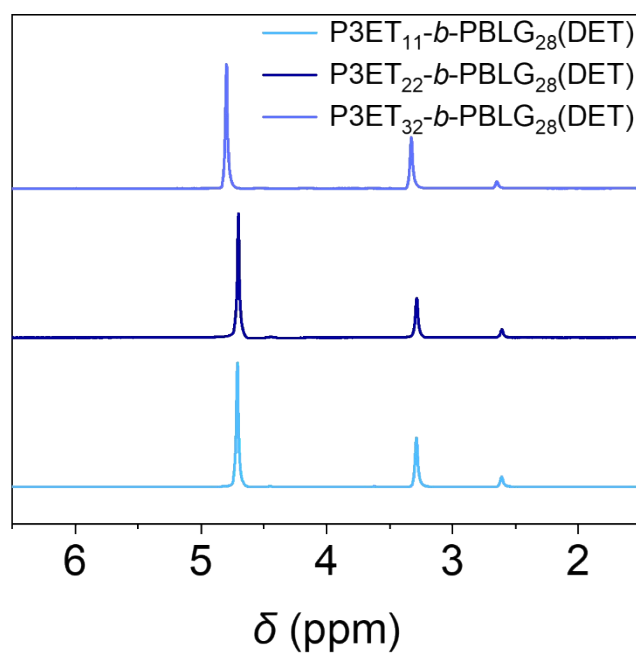

**Fig. S5**  $^1\text{H}$  NMR spectrum of  $\text{P3ET}_n\text{-}b\text{-PBLG}_m(\text{DET})$ s in water.

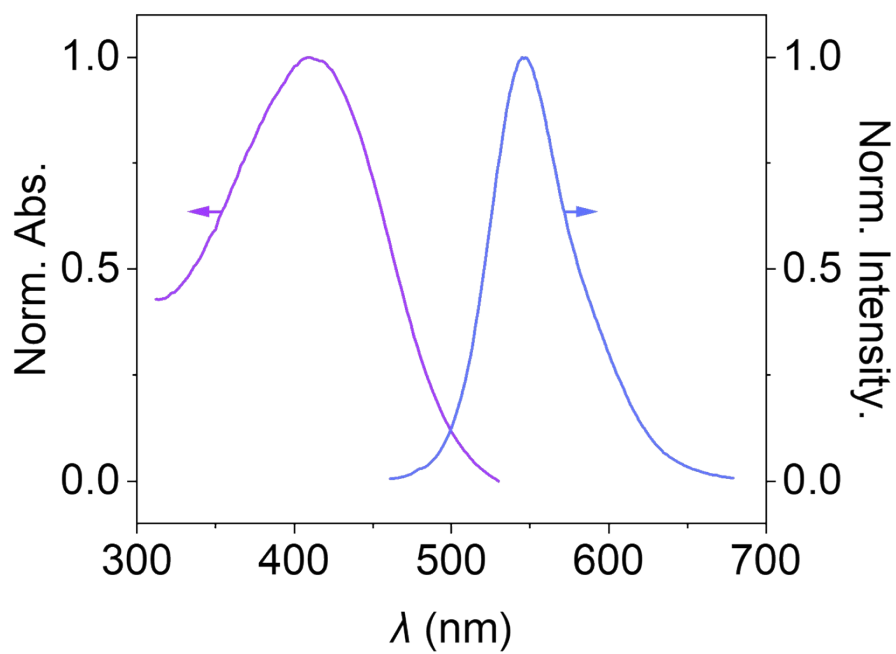

**Fig. S6** Normalized UV-vis and fluorescence spectra of  $\text{P3ET}_{11}$  in THF.

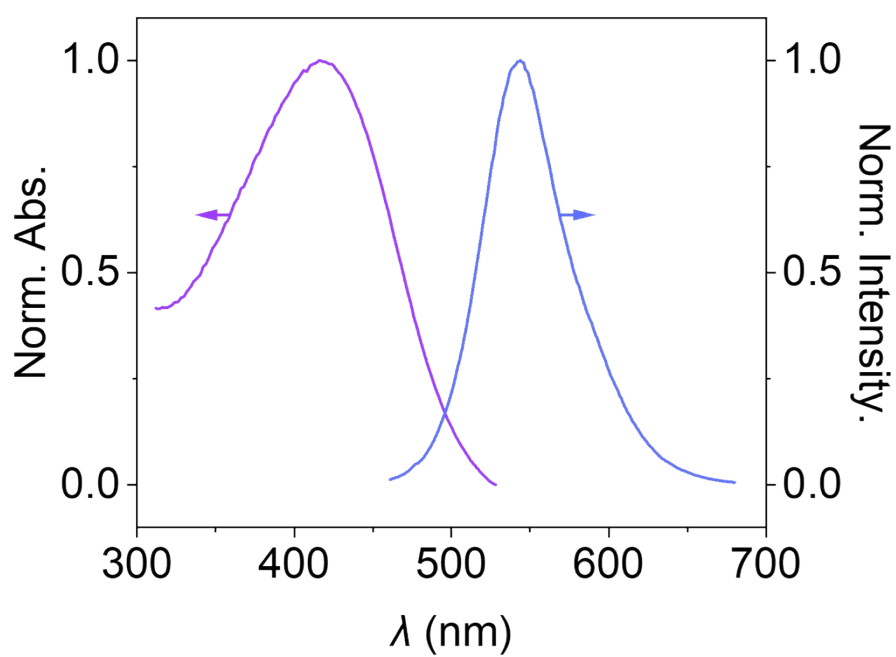

**Fig. S7** Normalized UV-vis and fluorescence spectra of P3ET<sub>22</sub> in THF.

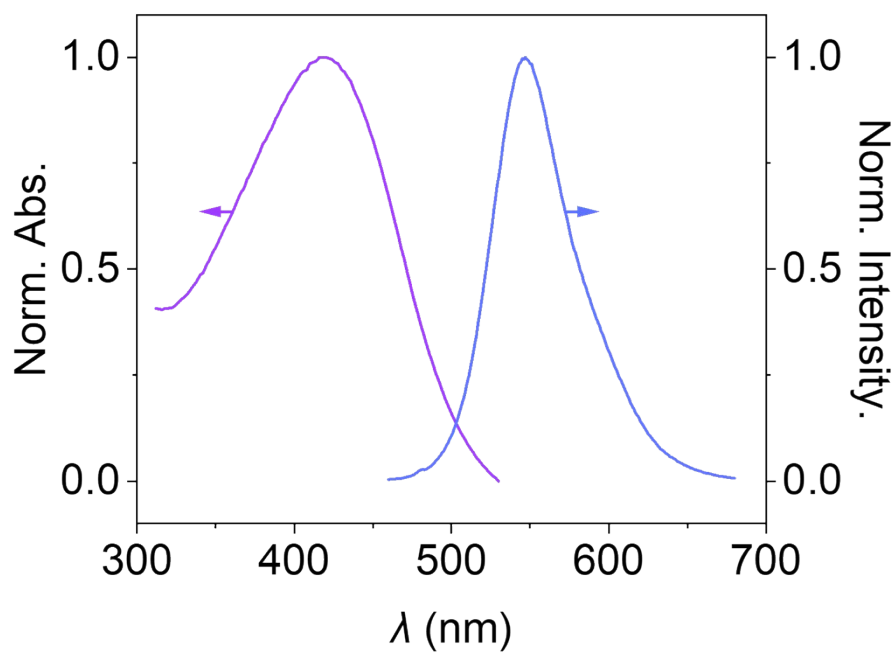

**Fig. S8** Normalized UV-vis and fluorescence spectra of P3ET<sub>32</sub> in THF.

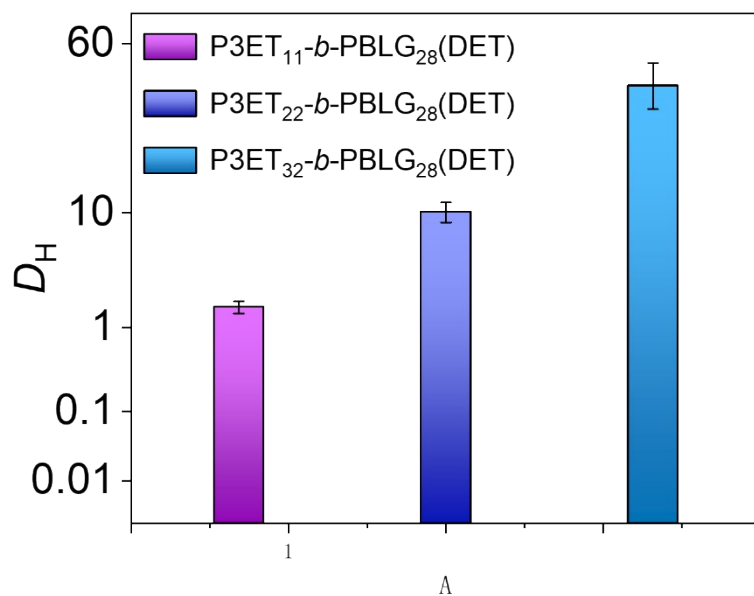

**Fig. S9**  $D_H$ s of the cationic diblock copolymers P3ET<sub>11</sub>-*b*-PBLG<sub>28</sub>(DET), P3ET<sub>22</sub>-*b*-PBLG<sub>28</sub>(DET), and P3ET<sub>32</sub>-*b*-PBLG<sub>28</sub>(DET) in aqueous solution. Data are presented as mean  $\pm$  standard deviation (n = 3 independent measurements).

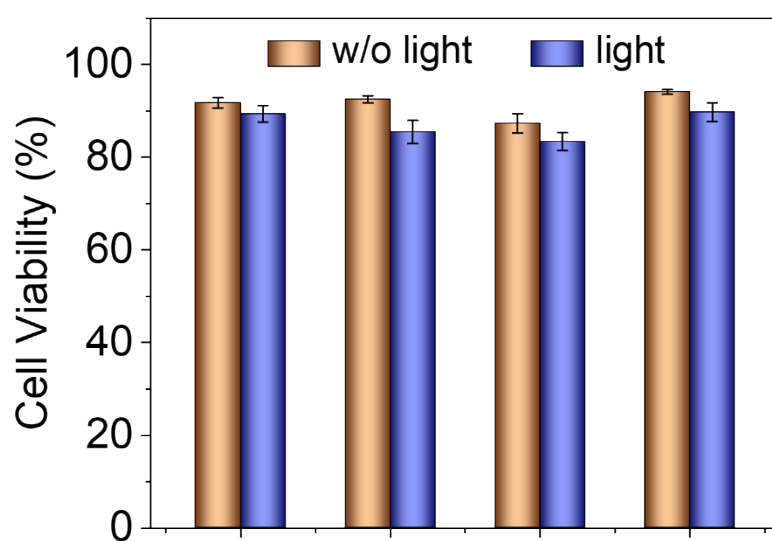

**Fig. S10** In vitro cytotoxicity of polyplexes with or without PCI treatment ( $\lambda > 400$  nm,  $300 \text{ mW} \cdot \text{cm}^{-2}$ , 2 min).
